# Supplementary material
Source: Springer Nature journal article supplement (https://www.springermedizin.de/resource/supplementary/12943_2014_1303_MOESM2_ESM.pdf/9553236)

Figure S2

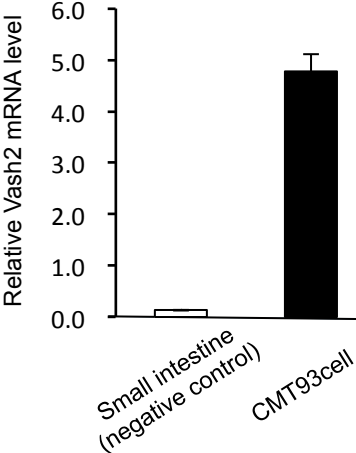

Supplement: MOESM2 [file 9553236]
